# Supplementary material for: A Cross-Sectional Study of Water, Sanitation, and Hygiene-Related Risk Factors for Soil-Transmitted Helminth Infection in Urban School- and Preschool-Aged Children in Kibera, Nairobi
Source: PLoS One. 2016 Mar 7;11(3):e0150744. doi: 10.1371/journal.pone.0150744 (PMC4780697; doi:10.1371/journal.pone.0150744)
Supplement: S1 Table — (PDF) [file pone.0150744.s001.pdf]

**Supplemental Table 1. Complete list of Bivariate Associations for Water, Sanitation, and Hygiene-related Risk Factors with Any Soil-Transmitted Helminth Infection among PSAC and SAC Children**

| Characteristic                                       | Observations | Frequency (%)/<br>Mean (SD) | Unadjusted PR | 95% CI     | P value |
|------------------------------------------------------|--------------|-----------------------------|---------------|------------|---------|
| <b><u>Household demographics</u></b>                 |              |                             |               |            |         |
| Female head of household education level (years)     | 676          | 8.20 (2.4)                  | 0.97          | 0.94-1.01  | 0.09    |
| Ethnicity                                            | 676          |                             |               |            |         |
| Kisii – Reference                                    |              | 40 (5.9%)                   | -             | -          | -       |
| Luhya                                                |              | 123 (18.2%)                 | 1.55          | 0.83-2.91  | 0.17    |
| Luo                                                  |              | 469 (69.4%)                 | 1.95          | 1.08-3.51  | 0.03*   |
| Other                                                |              | 44 (6.5%)                   | 1.57          | 0.78-3.19  | 0.21    |
| Household Crowding (individuals/bedroom)             | 676          | 5.09 (2.0)                  | 1.01          | 0.96-1.06  | 0.69    |
| Wealth                                               |              |                             |               |            |         |
| Factor 1 – Animals                                   | 676          | N/A                         | 0.96          | 0.87-1.06  | 0.44    |
| Factor 2 – Cooking                                   | 676          | N/A                         | 0.95          | 0.85-1.05  | 0.30    |
| Factor 3 – Household possessions                     | 676          | N/A                         | 0.94          | 0.83-1.06  | 0.32    |
| <b><u>Child characteristics</u></b>                  |              |                             |               |            |         |
| Age (years)                                          | 676          | 8.96 (4.43)                 | 0.99          | 0.97-1.01  | 0.46    |
| Female sex                                           | 676          | 360 (53.3%)                 | 0.97          | 0.80-1.16  | 0.72    |
| Dewormed in the last year                            | 676          | 380 (56.2%)                 | 0.80          | 0.66-0.96  | 0.02*   |
| Always wears shoes                                   | 676          | 189 (28.0%)                 | 0.80          | 0.64-1.01  | 0.06    |
| Attends nursery or school                            | 676          | 555 (82.1%)                 | 1.30          | 1.05-1.62  | 0.02*   |
| <b><u>Water indicators</u></b>                       |              |                             |               |            |         |
| Main water source                                    | 676          |                             |               |            |         |
| Piped water into dwelling, plot, or yard - Reference |              | 10 (1.5%)                   | -             | -          | -       |
| Other improved                                       |              | 666 (98.5%)                 | 3.32          | 0.54-20.39 | 0.20    |
| Unimproved                                           |              | 0 (0%)                      | -             | -          | -       |
| Water collection time > 60 min                       | 669          | 12 (1.79%)                  | 1.36          | 0.78-2.39  | 0.28    |
| Weekly household water expenditures (USD)            | 676          | \$2.15 (\$1.92)             | 0.91          | 0.69-1.21  | 0.52    |
| Weekly household water expenditures per person (USD) | 676          | \$0.38 (\$0.32)             | 0.96          | 0.91-1.01  | 0.16    |
| Constant water availability                          | 665          | 96 (14.4%)                  | 1.14          | 0.89-1.45  | 0.31    |
| Difficulty meeting water needs                       | 676          | 480 (71.0%)                 | 1.20          | 0.96-1.49  | 0.10    |
| Water stored in household                            | 675          | 599 (88.7%)                 | 0.90          | 0.68-1.18  | 0.43    |
| Narrow mouthed storage container (3 cm or less)      | 595          | 381 (64.0%)                 | 1.02          | 0.83-1.25  | 0.86    |
| Storage container covered                            | 593          | 518 (87.4%)                 | 0.75          | 0.58-0.96  | 0.02*   |
| Storage container on floor                           | 592          | 445 (75.2%)                 | 1.18          | 0.92-1.52  | 0.19    |
| Ever treats water                                    | 676          | 411 (60.8%)                 | 0.87          | 0.72-1.05  | 0.14    |
| Always treats water                                  | 676          | 256 (37.9%)                 | 0.81          | 0.66-0.99  | 0.04*   |
| Treats water frequency                               | 676          | 411 (60.8%)                 | 0.87          | 0.72-1.05  | 0.14    |
| Always - Reference                                   |              | 256 (37.9%)                 | -             | -          | -       |
| Usually                                              |              | 84 (12.4%)                  | 1.58          | 1.23-2.04  | <0.001* |
| Sometimes                                            |              | 67 (9.9%)                   | 0.80          | 0.52-1.21  | 0.29    |
| Never                                                |              | 269 (39.8%)                 | 1.24          | 1.00-1.54  | 0.05    |
| <b><u>Sanitation</u></b>                             |              |                             |               |            |         |
| Main sanitation facility                             | 676          |                             |               |            |         |
| Improved                                             |              | 9 (1.33%)                   | 0.31          | 0.05-1.93  | 0.21    |
| Shared - Reference                                   |              | 578 (85.0%)                 | -             | -          | -       |
| Unimproved                                           |              | 68 (10.1%)                  | 1.15          | 0.87-1.51  | 0.32    |
| Open Defecation                                      |              | 21 (3.2%)                   | 1.01          | 0.59-1.73  | 0.97    |
| Improved or shared sanitation facility (Day)         | 675          | 590 (87.4%)                 | 0.90          | 0.70-1.17  | 0.43    |
| Improved or shared sanitation facility (Night)       | 673          | 428 (63.6%)                 | 0.86          | 0.71-1.03  | 0.10    |
| Shares toilet facility                               | 673          | 642 (95.4%)                 | 1.25          | 0.74-2.10  | 0.40    |
| Toilet used by at least 5 other households           | 673          | 468 (69.5%)                 | 0.93          | 0.77-1.12  | 0.43    |
| Toilet used by at least 10 other households          | 673          | 424 (63.0%)                 | 0.90          | 0.74-1.09  | 0.27    |
| Improved infant stool disposal                       | 658          | 307 (46.7%)                 | 0.95          | 0.78-1.14  | 0.57    |
| Toilet located outside household premises            | 675          | 557 (82.5%)                 | 1.33          | 1.00-1.77  | 0.047*  |
| Feces observed in toilet facility                    | 641          | 439 (68.5%)                 | 1.09          | 0.88-1.35  | 0.42    |
| Sewage observed pooling from latrine                 | 642          | 93 (14.5%)                  | 1.00          | 0.76-1.31  | 0.99    |
| Toilet component in good condition                   |              |                             |               |            |         |
| Roof                                                 | 642          | 527 (82.0%)                 | 0.83          | 0.66-1.04  | 0.11    |
| Slab <sup>‡</sup>                                    | 590          | 543 (92.0%)                 | 0.88          | 0.62-1.23  | 0.45    |

|                                           |     |              |      |           |        |
|-------------------------------------------|-----|--------------|------|-----------|--------|
| Door                                      | 642 | 563 (89.2%)  | 0.89 | 0.68-1.16 | 0.38   |
| <b>Hygiene</b>                            |     |              |      |           |        |
| Washed hands today or yesterday           | 675 | 657 (97.3%)  | 0.88 | 0.53-1.47 | 0.63   |
| Owens soap                                | 676 | 620 (91.7%)  | 0.84 | 0.63-1.13 | 0.26   |
| Used soap today or yesterday              | 675 | 606 (89.8%)  | 0.91 | 0.68-1.21 | 0.50   |
| “When do you wash your hands?”            | 675 |              |      |           |        |
| After defecating/using the toilet         |     | 608 (90.1%)  | 1.01 | 0.74-1.37 | 0.97   |
| Before preparing food or cooking          |     | 628 (93.0%)  | 1.23 | 0.81-1.89 | 0.33   |
| Before feeding children                   |     | 60 (8.9%)    | 0.83 | 0.58-1.20 | 0.33   |
| Handwashing station characteristics       |     |              |      |           |        |
| Water dispensed into basin                | 369 | 353 (95.6%)  | 2.60 | 0.72-9.33 | 0.14   |
| Water available                           | 436 | 355 (96.4%)  | 1.39 | 0.60-3.24 | 0.44   |
| Cleanser available                        | 436 | 326 (87.6%)  | 0.92 | 0.62-1.36 | 0.59   |
| Towel available                           | 371 | 71 (19.1%)   | 0.69 | 0.45-1.04 | 0.08   |
| Handwashing station available near toilet | 644 | 117 (17.7%)  | 1.19 | 0.95-1.50 | 0.14   |
| Handwashing demonstration                 |     |              |      |           |        |
| Washed hands 30 seconds                   | 486 | 223 (45.9%)  | 0.96 | 0.83-1.11 | 0.57   |
| Washed both hands                         | 486 | 478 (98.4%)  | 0.66 | 0.37-1.19 | 0.17   |
| Rubbed hands together at least 3 times    | 486 | 466 (95.9%)  | 0.82 | 0.51-1.32 | 0.42   |
| Washed with water                         | 486 | 484 (99.6%)  | 1.39 | 0.60-3.24 | 0.44   |
| Used cleanser                             | 486 | 408 (84.0%)  | 0.84 | 0.64-1.10 | 0.19   |
| Used soap                                 | 486 | 405 (83.3%)  | 0.81 | 0.63-1.06 | 0.12   |
| Dried hands                               | 486 | 298 (61.3%)  | 0.98 | 0.78-1.23 | 0.87   |
| Dried hands on garment                    | 486 | 157 (32.3%)  | 1.08 | 0.86-1.37 | 0.49   |
| Dried hands in air                        | 486 | 45 (9.3%)    | 1.22 | 0.88-1.70 | 0.24   |
| Dried hands with towel                    | 486 | 96 (19.8%)   | 0.75 | 0.55-1.04 | 0.09   |
| Dried hands with clean towel              | 484 | 78 (16.1%)   | 0.58 | 0.38-0.87 | <0.01* |
| <b>Environment</b>                        |     |              |      |           |        |
| Elevation (10 meter increments)           | 676 | 1,740 (12.0) | 0.89 | 0.83-0.96 | <0.01* |
| Finished household flooring material†     | 676 | 566 (83.7%)  | 0.76 | 0.62-0.94 | 0.01*  |
| Electricity in the home                   | 676 | 602 (89.1%)  | 0.70 | 0.55-0.87 | <0.01* |
| Household floods during rain              | 676 | 248 (36.7%)  | 1.00 | 0.82-1.21 | 0.98   |
| Feces observed in yard                    | 675 | 159 (23.6%)  | 1.14 | 0.93-1.41 | 0.20   |
| Sewage observed in yard                   | 676 | 49 (7.3%)    | 1.09 | 0.78-1.52 | 0.63   |
| Sewage observed in neighbour's yard       | 676 | 122 (18.1%)  | 0.94 | 0.73-1.20 | 0.63   |

\* p-value <0.05

\*\* p-value ≤0.01

† - Finished flooring material includes vinyl/asphalt strips, cement, or carpet

¥ - The quality of slab was not assessed on facilities that were not designed to include a slab (i.e., pit latrine without a slab)
